## Cardiovascular Effects of Propofol in Dogs with Dilated Cardiomyopathy

Paul S. Pagel, M.D., Ph.D.,\* Douglas A. Hettrick, Ph.D.,† Judy R. Kersten, M.D.,†  
Dermot Lowe, M.B., F.F.A.R.C.S.I.,‡ David C. Warltier, M.D., Ph.D.§

**Background:** The authors tested the hypothesis that propofol improves left ventricular diastolic function in dogs with dilated cardiomyopathy by reducing left ventricular preload and afterload.

**Methods:** Seven dogs were instrumented for left ventricular and aortic pressures, aortic blood flow, and subendocardial segment length. Left ventricular afterload and contractility were quantified with aortic input impedance and preload recruitable stroke work, respectively. Diastolic function was evaluated with a time constant of left ventricular relaxation ( $\tau$ ); segment-lengthening velocities and time-velocity integrals during early left ventricular filling ( $dL/dt_E$  and TVI-E, respectively) and atrial systole ( $dL/dt_A$  and TVI-A, respectively); and a regional chamber stiffness constant (K). Dogs were paced at 240 beats/min for  $18 \pm 3$  days, and hemodynamics were recorded in sinus rhythm in the conscious state. Anesthesia was induced with propofol (5 mg/kg) and maintained with propofol infusions at 25, 50, and 100  $\text{mg} \cdot \text{kg}^{-1} \cdot \text{h}^{-1}$ , and hemodynamics were recorded after 15 min of equilibration at each dose.

**Results:** Propofol decreased mean arterial pressure, left ventricular end-diastolic pressure, and K but did not change heart rate. Propofol reduced total arterial resistance and increased total arterial compliance derived from aortic input impedance. Propofol also reduced preload recruitable stroke work. The lowest dose of propofol decreased  $\tau$ . Propofol decreased  $dL/dt_E$  and TVI-E and reduced the  $dL/dt_E/A$  and TVI-E/A ratios.

**Conclusions:** Propofol reduces left ventricular preload, afterload, and regional chamber stiffness, causes direct negative inotropic effects, and impairs early-diastolic left ventricular filling in dogs with dilated cardiomyopathy. (Key words: Diastolic function; heart failure; isovolumic relaxation; left ventricular afterload; myocardial contractility; power spectrum analysis; preload recruitable stroke work; rapid ventricular filling.)

This article is highlighted in "This Month in Anesthesiology." Please see this issue of ANESTHESIOLOGY, page 5A.

\* Associate Professor of Anesthesiology.

† Assistant Professor of Anesthesiology.

‡ Research Fellow in Anesthesiology.

§ Professor of Anesthesiology, Pharmacology and Toxicology, and Medicine (Division of Cardiovascular Diseases); Vice Chair for Research of Anesthesiology.

Received from the Departments of Anesthesiology, Pharmacology and Toxicology, and Medicine (Division of Cardiovascular Diseases), the Medical College of Wisconsin and the Clement J. Zablocki Veterans Affairs Medical Center, and the Department of Biomedical Engineering, Marquette University, Milwaukee, Wisconsin. Submitted for publication May 5, 1997. Accepted for publication September 2, 1997. Supported in part by US PHS grants R01 HL54820 to Dr. Warltier and K08 HL03690 to Dr. Kersten and by anesthesiology research training grant GM08377 to Dr. Warltier.

Address reprint requests to Dr. Pagel: Medical College of Wisconsin, MEB—Room 462C, 8701 Watertown Plank Road, Milwaukee, Wisconsin, 53226. Address electronic mail to: ambarnes@mcw.edu

THE cardiovascular effects of propofol during anesthesia<sup>1</sup> in patients with normal cardiac performance have been attributed to the combined actions of decreases in left ventricular (LV) preload and afterload produced by venous<sup>2</sup> and arterial vasodilation,<sup>3</sup> inhibition of sympathetic nervous system activity,<sup>4-6</sup> and impairment of baroreceptor-mediated reflexes.<sup>4-6</sup> Propofol-induced myocardial depression has also been implicated in the declines in arterial pressure and cardiac output produced by this anesthetic, although the relative contribution of this negative inotropic effect to the reduction of arterial pressure has been debated intensely. Several studies have shown that propofol produces modest decreases in myocardial contractility in normal cardiac muscle *in vitro*<sup>7-9</sup> and *in vivo*<sup>10-12</sup>; however, other studies have failed to demonstrate this negative inotropic effect.<sup>13,14</sup> Although the actions of propofol on LV systolic performance are somewhat controversial, propofol has been shown to preserve indices of LV diastolic function in healthy dogs,<sup>15</sup> even at doses that would be supratherapeutic in humans. It is unlikely, therefore, that abnormalities in LV diastolic function contribute to the cardiovascular effects of propofol in the healthy heart.

The hemodynamic effects of propofol in patients with mildly compromised LV function undergoing coronary



## PROPOFOL AND LV DYSFUNCTION

artery bypass surgery<sup>16-19</sup> are similar to those described in patients with normal cardiac performance, but the precise cardiovascular actions of propofol in the presence of severe LV dysfunction are unknown. Recent studies in isolated ventricular myocytes<sup>20</sup> and LV trabecular muscle<sup>21</sup> obtained from pigs with pacing-induced cardiomyopathy and explanted failing hearts of human recipients of cardiac transplants, respectively, have demonstrated that propofol causes direct negative inotropic effects that may be more pronounced than those produced by this intravenous anesthetic in normal myocardium. Despite the finding that these results have not been uniformly supported,<sup>22</sup> extrapolation of these results<sup>20,21</sup> to the intact cardiovascular system suggests that depression of myocardial contractility may play a more important role in determining the hemodynamic effects of propofol in the setting of congestive heart failure. The influence of propofol on LV diastolic mechanics also has not been described in the failing heart. Further, propofol has been shown to produce unique, beneficial effects on total arterial resistance and total arterial compliance determined from aortic input impedance ( $Z_{in}(\omega)$ ) spectra in healthy dogs,<sup>3</sup> but whether these favorable alterations in the determinants of LV afterload are preserved during anesthesia with propofol in the presence of LV dysfunction are unknown.

The current investigation examined the cardiovascular effects of propofol on systemic and coronary hemodynamics,  $Z_{in}(\omega)$ , and LV systolic and diastolic function in a model of chronically instrumented canines with LV dysfunction produced by rapid LV pacing. We<sup>23,24</sup> and others<sup>25-27</sup> have shown that 3 weeks of rapid LV pacing causes progressive biventricular dilation with increased filling pressures and pronounced LV systolic and diastolic dysfunction but without frank congestive heart failure. The current investigation tested the hypothesis that propofol results in improvements in LV diastolic function by causing reductions in LV preload and afterload despite producing simultaneous negative inotropic effects in dogs with dilated cardiomyopathy.

## Materials and Methods

All experimental procedures and protocols used in this investigation were reviewed and approved by the Animal Care and Use Committee of the Medical College of Wisconsin. All procedures conformed to the *Guiding Principles in the Care and Use of Animals* of the American Physiological Society and were performed in accor-

dance with the *Guide for the Care and Use of Laboratory Animals*.

### Experimental Model

The surgical implantation of instruments has been described in detail previously.<sup>23</sup> Briefly, in the presence of general anesthesia and using aseptic techniques, a left thoracotomy was performed in conditioned mongrel dogs for placement of instruments for measurement of aortic, left atrial, and intrathoracic pressures (heparin-filled catheters); aortic blood flow (Doppler flow transducer); left anterior descending coronary artery blood flow velocity (ultrasonic flow transducer); subendocardial segment length (ultrasonic crystals); LV pressure (high fidelity, miniature micromanometer); and the peak rates of increases and decreases in LV pressure ( $dP/dt_{max}$  and  $-dP/dt_{min}$ , respectively). A hydraulic vascular occluder was placed around the inferior vena cava for abrupt reduction of LV preload. Stainless steel pacing electrodes were sutured to the epicardial surface of the LV free wall. All instruments were firmly secured, tunneled between the scapulae, and exteriorized via several small incisions. The pericardium was left open wide, the chest wall was closed in layers, and the pneumothorax was evacuated by a chest tube. Each dog was fitted with a jacket to prevent damage to the instruments, catheters, and pacing electrodes.

All dogs received fentanyl for analgesia as needed after surgery. Dogs were allowed to recover for a minimum of 7 days before experimentation, during which time all were treated with intramuscular antibiotic agents (cephalothin at 40 mg/kg and gentamicin at 4.5 mg/kg) and trained to stand quietly in a sling during hemodynamic monitoring. Segment length and coronary blood flow velocity signals were monitored by ultrasonic amplifiers. End-systolic and end-diastolic segment lengths were measured 30 ms before LV  $-dP/dt_{min}$  and immediately before the onset of LV isovolumic contraction, respectively. Percent segment shortening (%SS) was determined using the equation  $\%SS = (EDL - ESL) \cdot 100 \cdot EDL^{-1}$ . Relative diastolic coronary vascular resistance was calculated as the quotient of diastolic arterial pressure to diastolic coronary blood flow velocity. An estimate of myocardial oxygen consumption, the pressure-work index, was determined using a previously validated formula.<sup>28</sup> Hemodynamic data were recorded continuously on a polygraph and simultaneously digitized and recorded on a computer.



### Experimental Protocol

After each dog ( $n = 7$ ; mean  $\pm$  SEM weight,  $25.3 \pm 0.4$  kg) had recovered from surgery, the LV of the dog was paced continuously at rates between 220 and 240 beats/min as previously described.<sup>23</sup> Dogs were brought to the laboratory on each day after the initiation of pacing to monitor the development of pacing-induced cardiomyopathy. Pacing was discontinued during and restarted immediately after this brief period of daily hemodynamic monitoring and was discontinued for the duration of the experiment. All dogs were fasted overnight before experimentation. Fluid deficits were replaced with 0.9% saline (500 ml), and intravenous saline infusion was continued at  $3 \text{ ml} \cdot \text{kg}^{-1} \cdot \text{h}^{-1}$  for the duration of each experiment.

After instruments were calibrated, baseline systemic and coronary hemodynamics were recorded in the conscious state (sinus rhythm). Left ventricular and intrathoracic pressures and segment length waveforms also were recorded for later off-line analysis of LV systolic and diastolic function. Regional myocardial contractility was evaluated using a series of LV pressure-segment length diagrams generated by abrupt inferior vena cava constriction as previously described.<sup>23</sup> The slope of the regional preload recruitable stroke work ( $M_w$ ) relation derived from these LV pressure-segment length diagrams was used to quantify myocardial contractility. The time constant of LV isovolumic relaxation ( $\tau$ ) was calculated using the derivative method. Segment-lengthening velocities during early ventricular filling ( $dL/dt_E$ ) and atrial systole ( $dL/dt_A$ ) and their corresponding time-velocity integrals (TVI-E and TVI-A, respectively) were determined from the continuous  $dL/dt$  waveform. Early ventricular filling fraction was calculated as the fraction of total segment lengthening occurring during early ventricular filling. A regional chamber stiffness constant ( $K$ ) was derived from LV pressure-segment length data between minimum ventricular pressure and the beginning of atrial systole using a monoexponential relation assuming a simple elastic model.

Left ventricular afterload was quantified with  $Z_{in}(\omega)$  spectra and interpreted using a three-element Windkessel model of the arterial circulation as previously described.<sup>29</sup> Briefly, digitized, steady-state aortic blood pressure and blood flow waveforms were transformed from the time to the frequency ( $\omega$ ) domain using power spectral analysis to determine  $Z_{in}(\omega)$ . The autopower spectrums of aortic pressure ( $P_{pp}[\omega]$ ) and blood flow ( $P_{pf}[\omega]$ ) and the crosspower spectrum between aortic pressure and blood flow waveforms ( $P_{pr}[\omega]$ ) were deter-

mined using a Welch periodogram, and  $Z_{in}(\omega)$  was calculated as the ratio of  $P_{pp}(\omega)$  to  $P_{pf}(\omega)$ . Each calculated  $Z_{in}(\omega)$  spectrum was corrected for the phase responses of the aortic pressure and blood flow transducers. Correlation of aortic pressure and blood flow waveforms at each frequency of the  $Z_{in}(\omega)$  spectrum was determined using magnitude squared coherence.  $Z_{in}(\omega)$  data with magnitude squared coherence values  $< 0.8$  were discarded from the analysis. Characteristic aortic impedance ( $Z_C$ ) was determined as the magnitude of  $Z_{in}(\omega)$  between 2 and 15 Hz. Total arterial resistance ( $R$ ) was calculated as the difference between  $Z_{in}(\omega)$  at 0 Hz and  $Z_C$ . Total arterial compliance ( $C$ ) was determined from aortic pressure and blood flow waveforms using a previously validated formula.<sup>30</sup>

Anesthesia was induced with 5 mg/kg of intravenous propofol and maintained with propofol infusions at 25, 50, and 100  $\text{mg} \cdot \text{kg}^{-1} \cdot \text{h}^{-1}$  administered in a sequential manner. The lungs of each dog were mechanically ventilated with oxygen-supplemented air (25% oxygen). Arterial blood gas tensions were maintained at levels obtained in the conscious state by adjustment of air and oxygen concentrations and respiratory rate throughout each experiment. Systemic and coronary hemodynamics and LV pressure, intrathoracic pressure, aortic pressure, aortic blood flow, and myocardial segment length waveforms were recorded under steady-state conditions and during inferior vena cava occlusion at end expiration after 15 min of equilibration at each propofol infusion rate. Thus, the effects of propofol on LV systolic and diastolic function and LV afterload were compared with data observed in the conscious state in chronically instrumented dogs with pacing-induced cardiomyopathy.

### Statistical Analysis

Statistical analysis of the data in the conscious state and during propofol anesthesia was performed by analysis of variance with repeated measures, followed by use of Student's  $t$  test with Duncan's adjustment for multiplicity. A probability value  $< 0.05$  was considered statistically significant. All data are expressed as mean  $\pm$  SEM.

### Results

The hemodynamic effects of propofol in dogs with pacing-induced cardiomyopathy are summarized in table 1. Propofol caused significant and dose-related



## PROPOFOL AND LV DYSFUNCTION

Table 1. Hemodynamic Effects of Propofol

|                                                              | Conscious       | Propofol ( $\text{mg} \cdot \text{kg}^{-1} \cdot \text{h}^{-1}$ ) |                  |                    |
|--------------------------------------------------------------|-----------------|-------------------------------------------------------------------|------------------|--------------------|
|                                                              |                 | 25                                                                | 50               | 100                |
| HR (bpm)                                                     | 90 $\pm$ 6      | 89 $\pm$ 9                                                        | 93 $\pm$ 9       | 92 $\pm$ 6         |
| MAP (mmHg)                                                   | 94 $\pm$ 2      | 81 $\pm$ 6*                                                       | 76 $\pm$ 7*      | 55 $\pm$ 5*†‡      |
| RPP ( $\text{mmHg} \cdot \text{bpm} \cdot 10^3$ )            | 10.3 $\pm$ 0.7  | 8.9 $\pm$ 1.3                                                     | 8.6 $\pm$ 1.3    | 6.3 $\pm$ 0.4*†    |
| LVSP (mmHg)                                                  | 110 $\pm$ 5     | 94 $\pm$ 4*                                                       | 86 $\pm$ 5*      | 67 $\pm$ 5*†‡      |
| LVEDP (mmHg)                                                 | 24 $\pm$ 2      | 16 $\pm$ 2*                                                       | 15 $\pm$ 2*      | 13 $\pm$ 2*†       |
| DCBFV ( $\text{Hz} \cdot 10^2$ )                             | 60 $\pm$ 11     | 53 $\pm$ 9                                                        | 53 $\pm$ 9       | 52 $\pm$ 10        |
| DCVR ( $\text{mmHg} \cdot \text{Hz}^{-1} \cdot 10^{-2}$ )    | 1.64 $\pm$ 0.24 | 1.60 $\pm$ 0.29                                                   | 1.46 $\pm$ 0.23  | 1.13 $\pm$ 0.19*†‡ |
| +dP/dt <sub>max</sub> ( $\text{mmHg} \cdot \text{s}^{-1}$ )  | 1,584 $\pm$ 49  | 1,305 $\pm$ 50*                                                   | 1,213 $\pm$ 80*  | 919 $\pm$ 74*†‡    |
| -dP/dt <sub>min</sub> ( $\text{mmHg} \cdot \text{s}^{-1}$ )  | -1,660 $\pm$ 75 | -1,363 $\pm$ 55*                                                  | -1,264 $\pm$ 74* | -967 $\pm$ 80*†‡   |
| EDL (mm)                                                     | 27.5 $\pm$ 2.5  | 26.5 $\pm$ 2.4*                                                   | 26.5 $\pm$ 2.5*  | 25.4 $\pm$ 2.4*†‡  |
| EEVFL (mm)                                                   | 26.2 $\pm$ 2.5  | 24.9 $\pm$ 2.5*                                                   | 24.9 $\pm$ 2.5*  | 24.1 $\pm$ 2.4*†‡  |
| ESL (mm)                                                     | 21.6 $\pm$ 2.4  | 21.3 $\pm$ 2.3                                                    | 21.2 $\pm$ 2.4   | 20.9 $\pm$ 2.2*    |
| SS (%)                                                       | 21.8 $\pm$ 2.7  | 20.1 $\pm$ 2.8                                                    | 20.2 $\pm$ 3.3   | 17.9 $\pm$ 2.6*    |
| EVFF (%)                                                     | 78.5 $\pm$ 3.0  | 69.1 $\pm$ 3.2*                                                   | 67.9 $\pm$ 4.3*  | 68.7 $\pm$ 3.2*    |
| L <sub>w</sub> (mm)                                          | 19.9 $\pm$ 2.3  | 18.8 $\pm$ 2.8                                                    | 18.7 $\pm$ 2.1   | 17.7 $\pm$ 1.7*    |
| MAQ ( $\text{L} \cdot \text{min}^{-1}$ )                     | 2.14 $\pm$ 0.25 | 1.85 $\pm$ 0.19*                                                  | 1.77 $\pm$ 0.16* | 1.47 $\pm$ 0.17*†  |
| SV (ml)                                                      | 24 $\pm$ 3      | 21 $\pm$ 3                                                        | 19 $\pm$ 2*      | 16 $\pm$ 2*†       |
| PWI ( $\text{ml} \cdot \text{min}^{-1} 100 \text{ g}^{-1}$ ) | 8.5 $\pm$ 0.5   | 7.5 $\pm$ 0.7                                                     | 7.2 $\pm$ 0.7    | 5.2 $\pm$ 0.4*†‡   |

Data are mean  $\pm$  SEM; n = 7.

HR = heart rate; MAP = mean aortic blood pressure; RPP = rate pressure product; LVSP and LVEDP = left ventricular systolic and end-diastolic pressure, respectively; DCBFV = diastolic coronary blood flow velocity; DCVR = diastolic coronary vascular resistance; EDL = end-diastolic segment length; EEVFL = end-early ventricular filling segment length; ESL = end-systolic segment length; SS = segment shortening; EVFF = early left ventricular filling fraction; L<sub>w</sub> = preload recruitable stroke work length intercept; MAQ = mean aortic blood flow; SV = stroke volume; PWI = pressure work index.

\* Significantly ( $P < 0.05$ ) different from conscious.

† Significantly ( $P < 0.05$ ) different from 25  $\text{mg} \cdot \text{kg}^{-1} \cdot \text{h}^{-1}$  propofol.

‡ Significantly ( $P < 0.05$ ) different from 50  $\text{mg} \cdot \text{kg}^{-1} \cdot \text{h}^{-1}$  propofol.

decreases in mean arterial pressure, LV systolic and end-diastolic pressures, end-diastolic segment length, and end-systolic segment length ( $P < 0.05$ ). Decreases in rate-pressure product, pressure-work index, and diastolic coronary vascular resistance were observed during infusion of the highest dose of propofol. Heart rate and diastolic coronary blood flow velocity were unchanged. Propofol caused dose-related reductions in  $M_w$  (67  $\pm$  5 during control to 34  $\pm$  4 mmHg during the 100  $\text{mg} \cdot \text{kg}^{-1} \cdot \text{h}^{-1}$  dose; fig. 1A), +dP/dt<sub>max</sub>, and %SS in cardiomyopathic dogs, which is consistent with depression of intrinsic myocardial contractility. Propofol also caused dose-related decreases in mean aortic blood flow (2.14  $\pm$  0.25 during control to 1.47  $\pm$  0.17 l/min during the 100  $\text{mg} \cdot \text{kg}^{-1} \cdot \text{h}^{-1}$  dose; table 1) and stroke volume. The lowest dose of propofol caused a decrease in  $\tau$  (62  $\pm$  4 during control to 54  $\pm$  4 ms; fig. 1B); however, no changes in  $\tau$  were observed during administration of higher doses. Decreases in K (2.05  $\pm$  0.54 during control to 0.33  $\pm$  0.06  $\text{mm}^{-1}$

during the 100  $\text{mg} \cdot \text{kg}^{-1} \cdot \text{h}^{-1}$  dose; fig. 1C) occurred concomitant with the declines in end-diastolic segment length and LV end-diastolic pressure. Propofol decreased dL/dt<sub>E</sub> (57  $\pm$  9 during control to 36  $\pm$  7 mm/s during the 100  $\text{mg} \cdot \text{kg}^{-1} \cdot \text{h}^{-1}$  dose; fig. 2A) and TVI-E (4.8  $\pm$  0.6 during control to 3.2  $\pm$  0.5 mm during the 100  $\text{mg} \cdot \text{kg}^{-1} \cdot \text{h}^{-1}$  dose; fig. 3A), which is consistent with a reduction in the rate and extent of early LV filling. In contrast, dL/dt<sub>A</sub> and TVI-A were unchanged (figs. 2B and 3B, respectively), and as a result, the ratios of dL/dt<sub>E</sub> to dL/dt<sub>A</sub> and TVI-E to TVI-A decreased (figs. 2C and 3C, respectively). Propofol also caused a reduction in early LV filling fraction (78.5  $\pm$  3.0 during control to 67.9  $\pm$  4.3% during the 50  $\text{mg} \cdot \text{kg}^{-1} \cdot \text{h}^{-1}$  dose; table 1). Propofol decreased R (3,850  $\pm$  470 during control to 3,020  $\pm$  270  $\text{dyn} \cdot \text{s} \cdot \text{cm}^{-5}$  during the 100  $\text{mg} \cdot \text{kg}^{-1} \cdot \text{h}^{-1}$  dose; fig. 4A) and increased C (0.70  $\pm$  0.90 during control to 1.79  $\pm$  0.23 ml/mmHg during the 100  $\text{mg} \cdot \text{kg}^{-1} \cdot \text{h}^{-1}$  dose; fig. 4B). Z<sub>c</sub> remained unchanged during administration of propofol (fig. 4C).



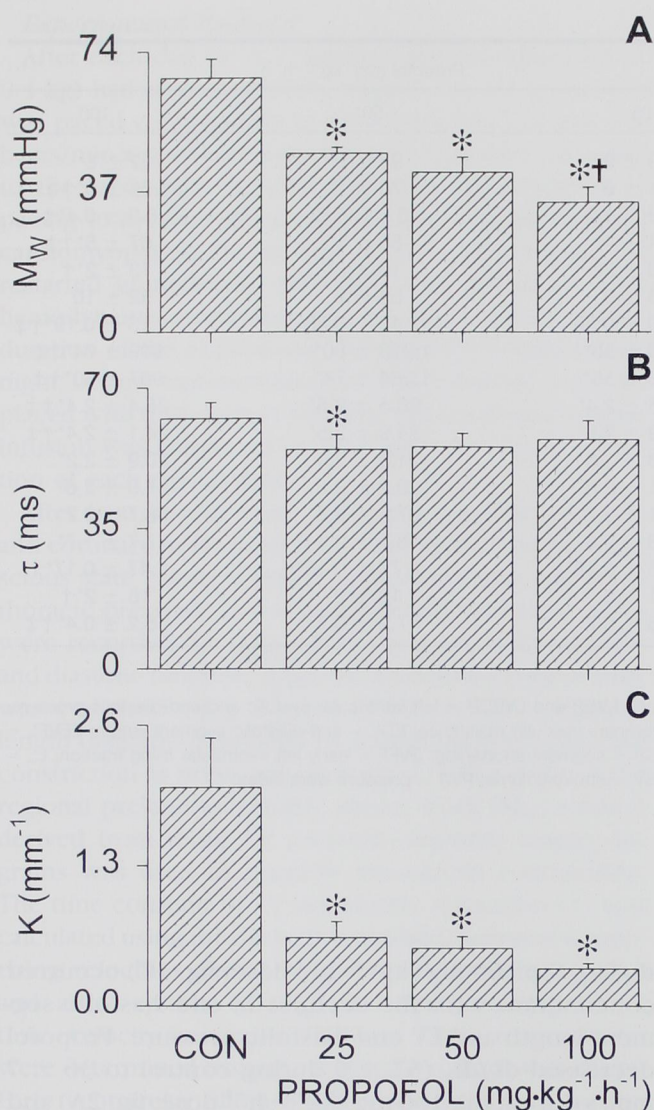

Fig. 1. Histograms illustrating the slope of the preload recruitable stroke work ( $M_w$ ) relation (A, top), the time constant of isovolumic relaxation ( $\tau$ ; B, middle), and the regional chamber stiffness ( $K$ ; C, bottom) in the conscious state (CON) and during 25-, 50-, and 100- $\text{mg} \cdot \text{kg}^{-1} \cdot \text{h}^{-1}$  infusions of propofol in dogs with pacing-induced cardiomyopathy. Data are mean  $\pm$  SEM;  $n = 7$ . \*Significantly different than CON ( $P < 0.05$ ); †significantly different than 25  $\text{mg} \cdot \text{kg}^{-1} \cdot \text{h}^{-1}$  of propofol ( $P < 0.05$ ).

## Discussion

The current results indicate that  $18 \pm 3$  days of rapid LV pacing produces cardiovascular effects that appear very similar to those we have reported previously in the identical canine model<sup>23,24</sup> When compared with the baseline systemic hemodynamics observed in healthy, chronically instrumented dogs,<sup>3,12</sup> conscious

dogs with pacing-induced cardiomyopathy demonstrated increases in baseline heart rate (underlying sinus rhythm), LV end-diastolic pressure, end-diastolic segment length, and end-systolic segment length; decreases in mean arterial and LV systolic pressures; and LV systolic and diastolic dysfunction in the current and previous<sup>23,24</sup> studies. Cardiac output and systemic vascular resistance remained unchanged during pacing of this

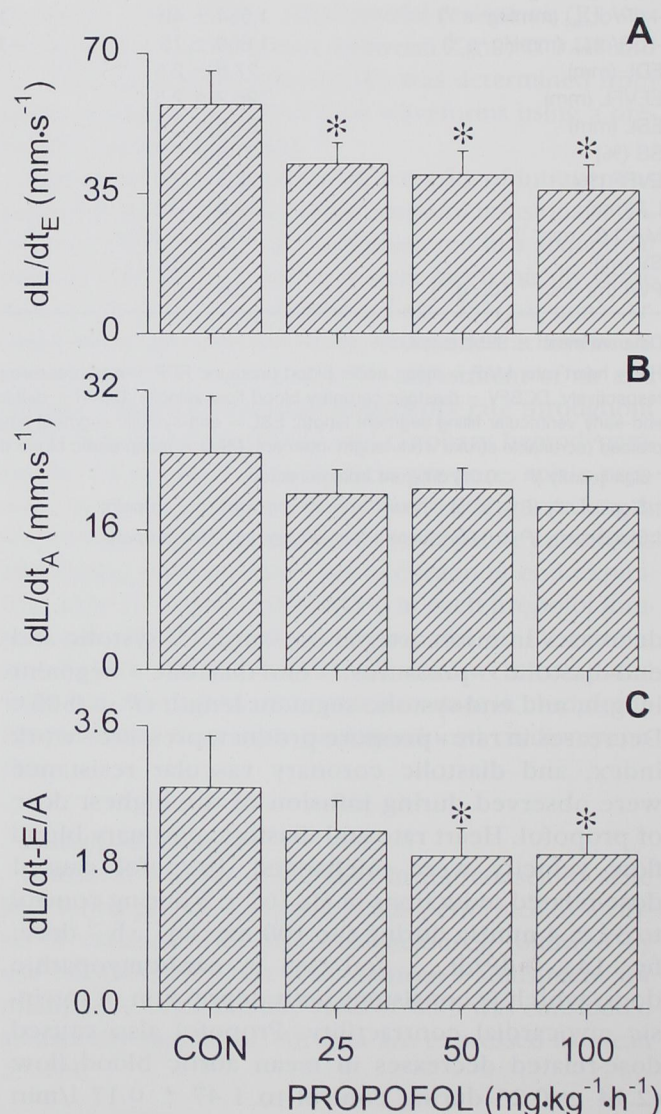

Fig. 2. Histograms illustrating the rate of segment lengthening during early LV filling ( $dL/dt_E$ ; A, top) and atrial systole ( $dL/dt_A$ ; B, middle) and the ratio of these parameters ( $dL/dt-E/A$ ; C, bottom) in the conscious state (CON) and during 25-, 50-, and 100- $\text{mg} \cdot \text{kg}^{-1} \cdot \text{h}^{-1}$  infusions of propofol in dogs with pacing-induced cardiomyopathy. Data are mean  $\pm$  SEM;  $n = 7$ . \*Significantly different than CON ( $P < 0.05$ ).



## PROPOFOL AND LV DYSFUNCTION

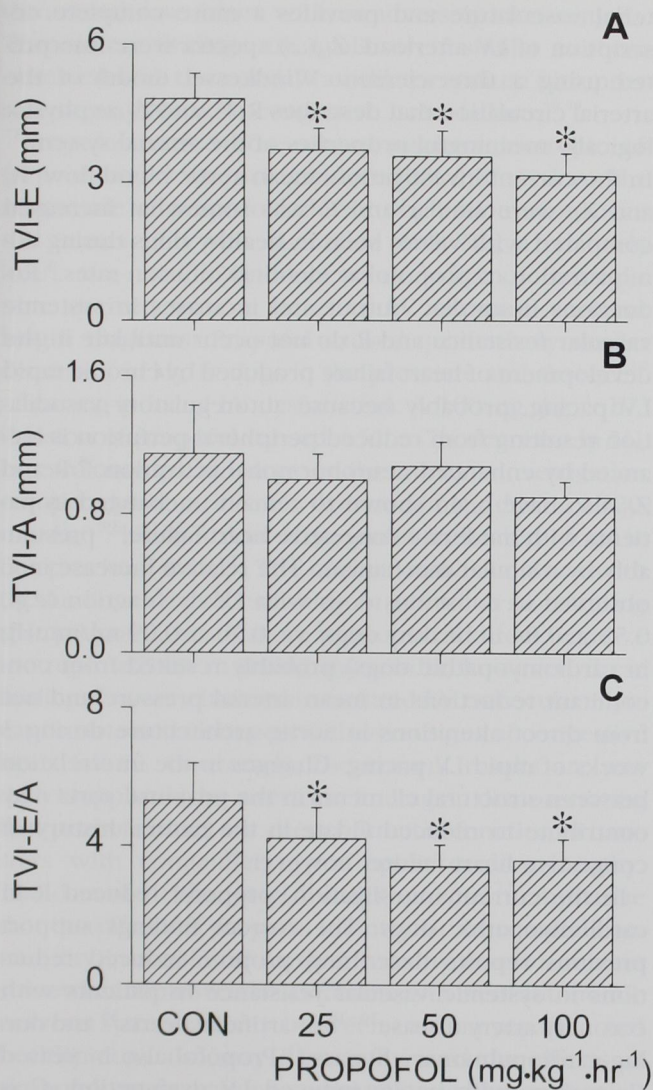

Fig. 3. Histograms illustrating the time-segment lengthening velocity integral during early LV filling (TVI-E; A, top) and atrial systole (TVI-A; B, middle) and the ratio of these parameters (TVI-E/A; C, bottom) in the conscious state (CON) and during 25-, 50-, and 100-mg·kg<sup>-1</sup>·h<sup>-1</sup> infusions of propofol in dogs with pacing-induced cardiomyopathy. Data are mean ± SEM; n = 7. \*Significantly different than CON ( $P < 0.05$ ).

duration. Thus, the current investigation examined the cardiovascular actions of propofol in a well-known, extensively characterized model of dilated cardiomyopathy<sup>23-27</sup> that has not decompensated into frank congestive heart failure.

These results in cardiomyopathic dogs indicate that propofol did not increase heart rate. These findings are similar to those observed in acutely instrumented dogs anesthetized with ketamine and fentanyl,<sup>31</sup> an experi-

mental preparation characterized by pronounced depression of LV systolic and diastolic function.<sup>32</sup> The current results are also supported by previous studies<sup>16-18</sup> examining the cardiovascular effects of propofol anesthesia in patients with coronary artery disease and mildly depressed LV performance. In these studies, propofol did not change<sup>17</sup> or caused only modest increases in heart rate concomitant with a reduction in arterial pressure.<sup>16,18</sup> The lack of change in heart rate may re-

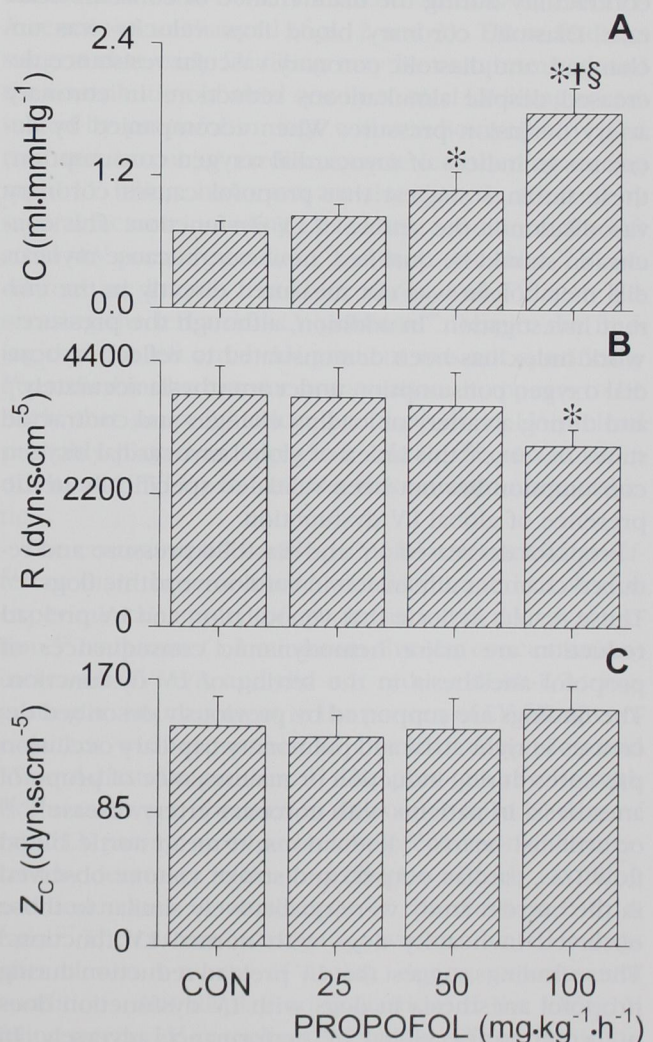

Fig. 4. Histograms illustrating total arterial compliance (C; A, top), total arterial resistance (R; B, middle), and characteristic aortic impedance (Z<sub>c</sub>; C, bottom) in the conscious state (CON) and during 25-, 50-, and 100-mg·kg<sup>-1</sup>·h<sup>-1</sup> infusions of propofol in dogs with pacing-induced cardiomyopathy. Data are mean ± SEM; n = 7. \*Significantly different than CON ( $P < 0.05$ ); †significantly different than 25 mg·kg<sup>-1</sup>·h<sup>-1</sup> of propofol ( $P < 0.05$ ); §significantly different than 50 mg·kg<sup>-1</sup>·h<sup>-1</sup> of propofol ( $P < 0.05$ ).



flect altered baroreceptor reflex activity and downregulation of cardiac  $\beta_1$ -adrenoceptors concomitant with basal increases in central sympathetic nervous system tone and withdrawal of parasympathetic nervous system activity associated with the development of heart failure.<sup>33</sup>

Propofol also reduced calculated indices of myocardial oxygen consumption in dogs with pacing-induced LV dysfunction, results that may be attributed to favorable decreases in LV preload, afterload, and myocardial contractility during the maintenance of constant heart rate. Diastolic coronary blood flow velocity was unchanged, and diastolic coronary vascular resistance decreased despite simultaneous reductions in coronary artery perfusion pressure. When accompanied by decreases in indices of myocardial oxygen consumption, these findings suggest that propofol causes coronary vasodilation in the setting of LV dysfunction. This conclusion should be qualified, however, because myocardial metabolism was not measured directly in the current investigation. In addition, although the pressure-work index has been demonstrated to reflect myocardial oxygen consumption under anesthesia accurately<sup>34</sup> and during a variety of loading changes and contractile states *in vivo*,<sup>35</sup> this index of global myocardial oxygen consumption has not been validated specifically in the presence of global LV dysfunction.

Propofol decreased LV end-diastolic pressure and reduced chamber dimension in cardiomyopathic dogs.<sup>3,12</sup> These results indicate that venodilation and LV preload reduction are major hemodynamic consequences of propofol anesthesia in the setting of LV dysfunction. The findings are supported by previously described decreases in right atrial and pulmonary capillary occlusion pressures during induction or maintenance of propofol anesthesia in patients with coronary artery disease<sup>16-18</sup> or artificial hearts.<sup>36</sup> Reductions in mean aortic blood flow (*i.e.*, cardiac output) and stroke volume observed in the current study were qualitatively similar to those observed in healthy dogs with normal LV function.<sup>3</sup> These findings suggest that LV preload reduction during propofol anesthesia in dogs with LV dysfunction does not compromise global LV performance adversely. In fact, the decreases in cardiac dimension and chamber pressures in diastole may be beneficial.

The effects of chronic LV pacing and propofol anesthesia on LV afterload in cardiomyopathic dogs were quantified with  $Z_{in}(\omega)$  spectra. In contrast to calculated systemic vascular resistance,  $Z_{in}(\omega)$  incorporates the frequency-dependent and viscoelastic properties of the ar-

terial vasculature and provides a more complete description of LV afterload.  $Z_{in}(\omega)$  spectra were interpreted using a three-element Windkessel model of the arterial circulation that describes R, C, and  $Z_C$  as physiologically meaningful properties of the arterial system.<sup>37</sup> In the current investigation, mean aortic blood flow, R, and  $Z_C$  were similar and C was somewhat increased compared with values seen in healthy dogs during administration of propofol at identical infusion rates.<sup>3</sup> Reductions in cardiac output and increases in systemic vascular resistance and R do not occur until late in the development of heart failure produced by chronic rapid LV pacing, probably because autoregulatory vasodilation resulting from reduced peripheral perfusion is balanced by enhanced neurohormonal activation.<sup>38</sup> R and  $Z_C$  also have been shown to remain unchanged in patients with moderate congestive heart failure,<sup>39</sup> presumably by a similar mechanism. The relative increase in C observed in conscious dogs with LV dysfunction (*e.g.*,  $0.53 \pm 0.04$  in healthy dogs<sup>3</sup> vs.  $0.70 \pm 0.09$  ml/mmHg in cardiomyopathic dogs) probably resulted from concomitant reductions in mean arterial pressure and not from direct alterations in aortic architecture during 3 weeks of rapid LV pacing. Changes in the interrelation between structural elements in the proximal aorta may contribute to reduced C late in the natural history of congestive heart failure, however.<sup>40</sup>

In the current investigation, propofol reduced R in cardiomyopathic dogs. The current findings support previous reports describing propofol-induced reductions in systemic vascular resistance in patients with coronary artery disease<sup>16-18</sup> or artificial hearts<sup>36</sup> and during cardiopulmonary bypass.<sup>41</sup> Propofol also increased C in dogs with pacing-induced LV dysfunction. C is determined primarily by aortic compliance,<sup>42</sup> and these elastic properties of the proximal aorta allow it to efficiently store and redistribute LV ejection energy during systole and diastole, respectively. The magnitude of the alterations in R and C produced by propofol was similar in cardiomyopathic compared with healthy dogs<sup>3</sup>; however, propofol did not increase  $Z_C$  in dogs with pacing-induced LV dysfunction. Although the resistance of the aorta to LV ejection makes a relatively small contribution to R, an increase in  $Z_C$ , such as that observed with propofol in healthy dogs,<sup>3</sup> may contribute to an attenuation of LV-arterial coupling and mechanical efficiency.<sup>43</sup> Thus, the current findings suggest that propofol produces beneficial decreases in resistance to LV ejection in the presence of LV dysfunction by favorably affecting the mechanical properties of the aorta and



## PROPOFOL AND LV DYSFUNCTION

the arterial vasculature without adversely increasing  $Z_C$ . The current findings are qualitatively similar to those observed with the arterial vasodilator sodium nitroprusside in patients with congestive heart failure.<sup>39,44</sup>

Propofol caused dose-related negative inotropic effects in dogs with pacing-induced LV dysfunction. The magnitude of propofol-induced depression of myocardial contractility was quantified with  $M_w$ , a relatively heart rate- and load-independent index of inotropic state derived from a series of LV pressure-segment length diagrams. Propofol caused qualitatively similar decreases in  $M_w$  in dogs in the presence and absence<sup>12</sup> of pacing-induced LV dysfunction. A  $100\text{-mg}\cdot\text{kg}^{-1}\cdot\text{h}^{-1}$  infusion of propofol caused a  $51 \pm 7\%$  decrease in  $M_w$  in cardiomyopathic dogs in the current investigation compared with a  $50 \pm 6\%$  decrease in  $M_w$  during a  $120\text{-mg}\cdot\text{kg}^{-1}\cdot\text{h}^{-1}$  infusion of propofol in healthy dogs in our previous study.<sup>12</sup> The current results contrast with the findings of a recent study *in vitro*<sup>20</sup> demonstrating that propofol causes more pronounced direct negative inotropic effects in failing myocardia; however, these findings<sup>20</sup> were obtained in isolated LV trabecular myocardia obtained from pigs with overt signs of congestive heart failure. Conversely, the current results are partially supported by previous findings<sup>22</sup> demonstrating that propofol does not alter contractile function in hamsters with congenital hypertrophic cardiomyopathy. The data of Hebbar *et al.*<sup>20</sup> and Riou *et al.*<sup>22</sup> emphasize that the effects of propofol on intrinsic myocardial contractility in models of cardiomyopathy *in vitro* remain somewhat controversial. Differences in basal autonomic nervous system activity between cardiomyopathic and healthy dogs also may have influenced the effects of propofol on myocardial contractility in the current investigation and cannot be completely excluded from the analysis. The mechanisms responsible for the negative inotropic effects of propofol in the failing heart are unknown. It is likely that the inhibition of transsarcolemmal calcium current<sup>45</sup> and L-type calcium channel function<sup>46</sup> observed with propofol in normal cardiac muscle also may play key roles in the contractile depression observed in the current and previous investigations.<sup>20,21</sup> These hypotheses remain to be tested *in vitro*, however.

The  $25\text{-mg}\cdot\text{kg}^{-1}\cdot\text{h}^{-1}$  dose of propofol decreased  $\tau$  in dogs with pacing-induced LV dysfunction despite a concomitant reduction in contractility. This result probably occurred as a consequence of decreases in end-diastolic segment length and LV end-diastolic pressure because relaxation of cardiac muscle has been shown

to be preload dependent.<sup>47</sup> In contrast to the findings with the lowest dose, the  $50\text{-}$  and  $100\text{-mg}\cdot\text{kg}^{-1}\cdot\text{h}^{-1}$  doses of propofol did not change  $\tau$ . Further reductions in LV preload and decreases in afterload observed with higher doses of this intravenous anesthetic were balanced by negative inotropic effects. Despite the modest improvement in  $\tau$  observed with the  $25\text{-mg}\cdot\text{kg}^{-1}\cdot\text{h}^{-1}$  dose of propofol, indices of the rate and extent of early LV filling (e.g.,  $dL/dt_E$  and TVI-E) decreased. In addition, propofol caused declines in early LV filling fraction and the  $dL/dt_E/A$  and TVI-E/A ratios because  $dL/dt_A$  and TVI-A remained unchanged (figs. 2 and 3). These findings suggest that early LV filling may be compromised and the contribution of atrial systole to total LV filling accentuated by propofol in dogs with cardiomyopathy. The rate and extent of cardiac muscle lengthening during rapid LV filling, however, are also directly affected by several factors, including LV loading conditions, the left atrial-LV pressure gradient, and inotropic state.<sup>48</sup> Venodilators are known to reduce  $dL/dt_E$  and TVI-E by decreasing the left atrial-LV gradient.<sup>48</sup> Despite the finding that the left atrial-LV gradient was not specifically quantified in the current investigation, it appears to be likely that propofol-induced reductions in LV preload probably played an important role in the reduction in  $dL/dt_E$  and TVI-E produced by this intravenous anesthetic.

The current results with propofol are somewhat different than those obtained with isoflurane in a similar experimental model of pacing-induced LV dysfunction.<sup>49</sup> Isoflurane (1.1 minimum alveolar concentration) increased TVI-E/A and did not reduce  $dL/dt_E/A$ , suggesting an improvement in the pattern of LV filling concomitant with reductions in chamber dimension and LV end-diastolic pressure.<sup>49</sup> The previous results with isoflurane were obtained in dogs after only 10 days of rapid LV pacing, an experimental preparation characterized by decreases in the contribution of early LV filling and reductions in or reversal of the classical E to A ratio.<sup>27</sup> The current investigation was conducted in dogs after almost 3 weeks of pacing, during experimental conditions that display normalization of the early LV filling rate as LV compliance decreases. Thus, the influence of propofol on indices of LV filling was examined in a model with a greater severity of LV dysfunction than those encountered in our previous study with volatile anesthetics.<sup>49</sup> Decreases in K produced by propofol were accompanied by declines in LV end-diastolic pressure and chamber dimension. These findings indicate that propofol-induced venodilation caused the LV pres-



sure-segment length diagram to shift to the left, causing the left ventricle to operate in a more compliant region of the end-diastolic pressure-length relation in propofol-anesthetized compared with conscious, cardiomyopathic dogs. Interpretation of these results require qualification, however, because the pericardium remained open after the surgical implantation of instruments and during the development of pacing-induced cardiomyopathy.

We<sup>3,12</sup> have previously demonstrated that the doses of propofol used in the current investigation produce reliable anesthesia in chronically instrumented dogs. Although plasma concentrations of propofol were not measured in this investigation, a previous study<sup>50</sup> demonstrated that infusions of 20 and 40 mg · kg<sup>-1</sup> · h<sup>-1</sup> produced plasma concentrations of 2–13 µg/ml in dogs. These plasma concentrations lie within the anesthetic range in humans. Thus, the 25- and 50-mg · kg<sup>-1</sup> · h<sup>-1</sup> infusions of propofol used in the current investigation may correlate with clinically relevant propofol concentrations. Direct comparison of the cardiovascular effects of this intravenous anesthetic between dogs with pacing-induced cardiomyopathy and humans with heart failure should be made with caution, however.

In summary, the current results indicate that propofol produces favorable reductions in LV preload, afterload, and K and preserves LV relaxation but also causes negative inotropic effects and impairs LV filling dynamics in dogs with dilated cardiomyopathy by chronic rapid LV pacing.

The authors thank Dave Schwabe, John Tessmer, and Rich Rys for technical assistance.

## References

1. Sebel PS, Lowdon JD: Propofol: A new intravenous anesthetic. *ANESTHESIOLOGY* 1989; 71:260–77
2. Muzi M, Berens RA, Kampine JP, Ebert TJ: Venodilation contributes to propofol-mediated hypotension in humans. *Anesth Analg* 1992; 74:877–83
3. Lowe D, Hettrick DA, Pagel PS, Warltier DC: Propofol alters left ventricular afterload as evaluated with aortic input impedance in dogs. *ANESTHESIOLOGY* 1996; 84:368–76
4. Ebert TJ, Muzi M, Berens R, Goff D, Kampine JP: Sympathetic responses to induction of anesthesia in humans with propofol or etomidate. *ANESTHESIOLOGY* 1992; 76:725–33
5. Ebert TJ, Muzi M: Propofol and autonomic reflex function in humans. *Anesth Analg* 1994; 78:369–75
6. Sellgren J, Ejnell H, Elam M, Ponten J, Wallin BG: Sympathetic muscle nerve activity, peripheral blood flows, and baroreceptor reflexes in humans during propofol anesthesia and surgery. *ANESTHESIOLOGY* 1994; 80:534–44
7. Park WK, Lynch C III: Propofol and thiopental depression of myocardial contractility: A comparative study of mechanical and electrophysiologic effects in isolated guinea pig ventricular muscle. *Anesth Analg* 1992; 74:395–405
8. Riou B, Besse S, Lecarpentier Y, Viars P: *In vitro* effects of propofol on rat myocardium. *ANESTHESIOLOGY* 1992; 76:609–16
9. Cook DJ, Housmans PR: Mechanism of the negative inotropic effect of propofol in isolated ferret ventricular myocardium. *ANESTHESIOLOGY* 1994; 80:859–71
10. Ismail EF, Kim SJ, Salem MR, Crystal GJ: Direct effects of propofol on myocardial contractility in situ canine hearts. *ANESTHESIOLOGY* 1992; 77:964–72
11. Stowe DF, Bosnjak ZJ, Kampine JP: Comparison of etomidate, ketamine, midazolam, propofol, and thiopental on function and metabolism of isolated hearts. *Anesth Analg* 1992; 74:547–58
12. Pagel PS, Warltier DC: Negative inotropic effects of propofol as evaluated using the regional preload recruitable stroke work relationship in chronically instrumented dogs. *ANESTHESIOLOGY* 1993; 78:100–8
13. Mouren S, Baron JF, Albo C, Szekely B, Arthaud M, Viars P: Effects of propofol and thiopental on coronary blood flow and myocardial performance in isolated rabbit heart. *ANESTHESIOLOGY* 1994; 80:634–41
14. Gelissen HP, Epema AH, Henning RH, Krijnen HJ, Hennis PJ, den Hertog A: Inotropic effects of propofol, thiopental, midazolam, etomidate, and ketamine on isolated human atrial muscle. *ANESTHESIOLOGY* 1996; 84:397–403
15. Pagel PS, Schmeling WT, Kampine JP, Warltier DC: Alteration of canine left ventricular diastolic function by intravenous anesthetics *in vivo*: Ketamine and propofol. *ANESTHESIOLOGY* 1992; 76:419–25
16. Stephan H, Sonntag H, Schenk HD, Kettler D, Khambatta HJ: Effects of propofol on cardiovascular dynamics, myocardial blood flow and myocardial metabolism in patients with coronary artery disease. *Br J Anaesth* 1986; 58:969–75
17. Vermeyen KM, Erpels FA, Janssen LA, Beeckman CP, Hane-greels GH: Propofol-fentanyl anaesthesia for coronary artery bypass surgery in patients with good left ventricular function. *Br J Anaesth* 1987; 59:1115–20
18. Kaplan JA, Guffin AV, Mikula S, Dolman J, Profeta J: Comparative hemodynamic effects of propofol and thiamylal sodium during anesthetic induction for myocardial revascularization. *J Cardiothorac Anesth* 1988; 2:297–302
19. Gordon PC, Morrell DF, Pamm JD: Total intravenous anesthesia using propofol and alfentanil for coronary artery bypass surgery. *J Cardiothorac Vasc Anesth* 1994; 8:284–8
20. Hebbard L, Dorman BH, Clair MJ, Roy RC, Spinale FG: Negative and selective effects of propofol on isolated swine myocyte contractile function in pacing-induced congestive heart failure. *ANESTHESIOLOGY* 1997; 86:649–59
21. Moravec CS, Schuetz SM, Stewart RW: Propofol exerts a direct negative inotropic effect on failing human ventricle (abstract). *Anesth Analg* 1997; 84:S108
22. Riou B, Lejay M, Lecarpentier Y, Viars P: Myocardial effects of propofol in hamsters with hypertrophic cardiomyopathy. *ANESTHESIOLOGY* 1995; 82:566–73
23. Pagel PS, McGough MF, Hettrick DA, Lowe D, Tessmer JP, Jamali IN, Warltier DC: Levosimendan enhances left ventricular systolic and diastolic function in conscious dogs with pacing-induced cardiomyopathy. *J Cardiovasc Pharmacol* 1997; 29:563–73
24. Jamali IN, Pagel PS, Hettrick DA, Lowe D, Kersten JR, Tessmer



## PROPOFOL AND LV DYSFUNCTION

- JP, Warltier DC: Positive inotropic and lusitropic effects of triiodothyronine in conscious dogs with pacing-induced cardiomyopathy. *ANESTHESIOLOGY* 1997; 87:102-9
25. Shannon RP, Komamura K, Stambler BS, Bigaud M, Manders WT, Vatner SF: Alterations in myocardial contractility in conscious dogs with dilated cardiomyopathy. *Am J Physiol* 1991; 260:H1903-11
26. Moe GW, Angus C, Howard RJ, Parker TG, Armstrong PW: Evaluation of indices of left ventricular contractility and relaxation in evolving canine experimental heart failure. *Cardiovasc Res* 1992; 26:362-6
27. Ohno M, Cheng C-P, Little WC: Mechanism of altered patterns of left ventricular filling during the development of congestive heart failure. *Circulation* 1994; 89:2241-50
28. Rooke GA, Feigl EO: Work as a correlate of canine left ventricular oxygen consumption, and the problem of catecholamine oxygen wasting. *Circ Res* 1982; 50:273-86
29. Hettrick DA, Pagel PS, Warltier DC: Differential effects of isoflurane and halothane on aortic input impedance quantified using a three element Windkessel model. *ANESTHESIOLOGY* 1995; 83:361-73
30. Liu Z, Brin KP, Yin FCP: Estimation of total arterial compliance: An improved method and evaluation of current methods. *Am J Physiol* 1986; 251:H588-600
31. Brussel T, Theissen JL, Vigfusson G, Lunkenheimer PP, Van Aken H, Lawin P: Hemodynamic and cardiodynamic effects of propofol and etomidate: Negative inotropic properties of propofol. *Anesth Analg* 1989; 69:35-40
32. Ihara T, Shannon RP, Komamura K, Pasipoularides A, Patrick T, Shen YT, Vatner SF: Effects of anaesthesia and recent surgery on diastolic function. *Cardiovasc Res* 1994; 28:325-36
33. Braunwald E: Pathophysiology of heart failure, *Heart Disease: A Textbook of Cardiovascular Medicine*. 4th edition. Edited by Braunwald E. Philadelphia, WB Saunders, 1992, pp 393-418
34. Rooke GA, Feigl EO: Low-dose halothane anesthesia does not affect the hemodynamic estimation of myocardial oxygen consumption in dogs. *ANESTHESIOLOGY* 1990; 72:682-93
35. Schipke JD, Burkhoff D, Kass DA, Alexander J Jr, Schaefer J, Sagawa K: Hemodynamic dependence of myocardial oxygen consumption indexes. *Am J Physiol* 1990; 258:H1281-91
36. Rouby JJ, Andreev A, Leger P, Arthaud M, Landault C, Vicaut E, Maistre G, Eurin J, Gandjbakhch I, Viars P: Peripheral vascular effects of thiopental and propofol in humans with artificial hearts. *ANESTHESIOLOGY* 1991; 75:32-42
37. Burkhoff D, Alexander J Jr, Schipke J: Assessment of Windkessel as a model of aortic input impedance. *Am J Physiol* 1988; 255:H742-53
38. Kiuchi K, Shannon RP, Sato N, Bigaud M, Lajoie C, Morgan KG, Vatner SF: Factors involved in delaying the rise in peripheral resistance in developing heart failure. *Am J Physiol* 1994; 267:H211-6
39. Kromer EP, Elsner D, Holmer SR, Muntze A, Riegger GAJ: Aortic input impedance and neurohormonal activation in patients with mild to moderate chronic heart failure. *Cardiovasc Res* 1992; 26:265-72
40. Cohn JN, Finkelstein SM: Abnormalities of vascular compliance in hypertension, aging and heart failure. *J Hypertens* 1992; 10(Suppl 6):S61-S4
41. Boer F, Ros P, Bovill JG, Van Brummelen P, Van der Krogt J: Effect of propofol on peripheral vascular resistance during cardiopulmonary bypass. *Br J Anaesth* 1990; 65:184-9
42. Westerhof N, Bosman F, De Vries CJ, Noordergraaf A: Analog studies of the human systemic arterial tree. *J Biomech* 1969; 2:121-43
43. Hettrick DA, Pagel PS, Warltier DC: Alterations in canine left ventricular-arterial coupling and mechanical efficiency produced by propofol. *ANESTHESIOLOGY* 1997; 86:1088-93
44. Yin FCP, Guzman PA, Brin KP, Maughan WL, Brinker JA, Traill TA, Weiss JL, Weisfeldt ML: Effect of nitroprusside on hydraulic vascular loads on the right and left ventricle of patients with heart failure. *Circ Res* 1983; 67:1330-9
45. Yang CY, Wong CS, Yu CC, Luk HN, Lin CI: Propofol inhibits cardiac L-type calcium current in guinea pig ventricular myocytes. *ANESTHESIOLOGY* 1996; 84:626-35
46. Zhou WG, Fontenot HJ, Liu S, Kennedy RH: Modulation of cardiac calcium channels by propofol. *ANESTHESIOLOGY* 1997; 86:670-5
47. Gillebert TC, Raes DF: Preload, length-tension relation, and isometric relaxation in cardiac muscle. *Am J Physiol* 1994; 267:H1872-9
48. Cheng C-P, Freeman GL, Santamore WP, Constantinescu MS, Little WC: Effect of loading conditions, contractile state, and heart rate on early diastolic left ventricular filling in conscious dogs. *Circ Res* 1990; 66:814-23
49. Pagel PS, Lowe D, Hettrick DA, Jamali IN, Kersten JR, Tessmer JP, Warltier DC: Isoflurane, but not halothane, improves indices of diastolic performance in dogs with rapid ventricular, pacing-induced cardiomyopathy. *ANESTHESIOLOGY* 1996; 85:644-54
50. Goodchild CS, Serrao JM: Cardiovascular effects of propofol in the anaesthetized dog. *Br J Anaesth* 1989; 63:87-92
